# Supplementary material for: Seismic and Geodetic Imaging (DInSAR) Investigation of the March 2021 Strong Earthquake Sequence in Thessaly, Central Greece
Source: MDPI journal article supplement (doi:10.3390/geosciences11080311), 2021-07-25
Supplement: s1 [file s1]

## Supplement material

Table S1. Source parameters of the three strongest earthquakes recorded in Thessaly area during March 2021. Links for data retrieved from the seismological centers: NOA (<https://bbnet.gein.noa.gr/HL/seismicity/mts/revised-moment-tensors>); UOA ([http://www.geophysics.geol.uoa.gr/stations/gmapv3\\_db/index.php](http://www.geophysics.geol.uoa.gr/stations/gmapv3_db/index.php)); AUTH (<http://geophysics.geo.auth.gr/ss/>); GEOFON/GFZ (<https://geofon.gfz-potsdam.de/>); GCMT (<https://www.globalcmt.org/>); USGS (<https://earthquake.usgs.gov/earthquakes/>); GEOSCOPE (<http://geoscope.ipgp.fr/index.php/en/catalog/250-catalog-of-earthquakes-in-2021>); EMSC ([https://www.emsc-csem.org/Earthquake/index\\_tensors.php](https://www.emsc-csem.org/Earthquake/index_tensors.php)); INGV (<http://terremoti.ingv.it/en/events>).

| Earthquake                   | $\phi_N^{(o)}$ | $\lambda_E^{(o)}$ | h (km) | $M_w$ | $m_b$ | $M_L$ | $M_s$ | $M_o$ (N*m) | Center   |
|------------------------------|----------------|-------------------|--------|-------|-------|-------|-------|-------------|----------|
| <b>3.3.2021</b><br>10:16:08  | 39.7545        | 22.1992           | 10     | 6.3   |       | 6.0   |       | 3.17e+18    | NOA      |
|                              | 39.7505        | 22.1980           | 7      | 6.3   |       | 6.0   |       | 3.12 e+18   | UOA      |
|                              | 39.732         | 22.218            | 6      | 6.2   |       | 6.0   |       |             | AUTH     |
|                              | 39.77          | 22.14             | 10     | 6.3   |       |       |       | 3.10 e+18   | GFZ      |
|                              | 39.65          | 22.14             | 12     | 6.3   |       |       | 6.3   | 3.14e+18    | GCMT     |
|                              | 39.7641        | 22.1756           | 10     | 6.3   |       |       |       |             | USGS     |
|                              | 39.7641        | 22.1756           | 10     | 6.2   |       |       |       | 2.7 e+18    | GEOSCOPE |
|                              | 39.76          | 22.21             | 8      | 6.3   |       |       |       |             | EMSC     |
|                              | 39.6           | 22.1              | 10     | 6.3   |       |       |       | 3.6 e+18    | INGV     |
| <b>4.3.2021</b><br>18:38:19  | 39.771         | 22.0958           | 11.3   | 6.0   |       | 5.9   |       | 1.36 e+18   | NOA      |
|                              | 39.7757        | 22.0852           | 15.0   | 6.1   |       |       |       | 2.03 e+18   | UOA      |
|                              | 39.782         | 22.116            | 10     | 5.9   |       | 5.8   |       |             | AUTH     |
|                              | 39.7886        | 22.1189           | 10     |       | 5.8   |       |       |             | USGS     |
|                              | 39.80          | 22.20             | 17     | 6.3   |       |       |       | 3.30 e+18   | GFZ      |
| <b>12.3.2021</b><br>12:57:50 | 39.8387        | 22.0134           | 7.0    |       |       | 5.2   |       |             | NOA      |
|                              | 39.8265        | 22.0075           | 5      |       |       | 5.2   |       |             | UOA      |
|                              | 39.805         | 21.922            | 7      |       |       | 5.1   |       |             | AUTH     |
|                              | 39.81          | 22.02             | 10     | 5.5   |       |       |       | 2.3 e+17    | GFZ      |
|                              | 39.77          | 21.96             | 12     | 5.6   |       |       | 5.6   | 2.7 e+17    | GCMT     |
|                              | 39.855         | 22.0304           | 10     | 5.6   |       |       |       | 2.92 e+17   | USGS     |
|                              | 39.84          | 22.01             | 7      | 5.6   |       |       |       |             | EMSC     |
|                              | 39.72          | 22.08             | 10     | 5.6   |       |       |       | 3.6 e+17    | INGV     |

Table S2. Geometric features of the two Nodal Planes determined in moment tensor solutions produced by several national and international seismological centers for the three strong earthquakes of March 2021. Links for data retrieved from the seismological centers as in Table S1.

| Earthquake                   | Strike (°) | Dip (°) | Rake (°) | Center   |
|------------------------------|------------|---------|----------|----------|
| <b>3.3.2021</b><br>10:16:08  | 146        | 59      | -79      | NOA      |
|                              | 305        | 59      | -108     |          |
|                              | 130        | 54      | -89      | UOA      |
|                              | 309        | 54      | -91      |          |
|                              | 131        | 54      | -92      | AUTH     |
|                              | 314        | 36      | -88      |          |
|                              | 130        | 45      | -90      | GFZ      |
|                              | 310        | 44      | -89      |          |
|                              | 119        | 45      | -109     | GCMT     |
|                              | 324        | 48      | -72      |          |
|                              | 307        | 36      | -100     | USGS     |
|                              | 139        | 55      | -83      |          |
|                              | 321        | 33      | -78      | GEOSCOPE |
|                              | 127        | 57      | -98      |          |
|                              | 116        | 41      | -114     | INGV     |
|                              | 327        | 53      | -70      |          |
| <b>4.3.2021</b><br>18:38:19  | 112        | 59      | -87      | NOA      |
|                              | 287        | 31      | -95      |          |
|                              | 308        | 50      | -92      | UOA      |
|                              | 131        | 40      | -88      |          |
|                              | 287        | 30      | -92      | AUTH     |
|                              | 109        | 60      | -89      |          |
|                              | 146        | 48      | -91      | GFZ      |
|                              | 329        | 41      | -88      |          |
| <b>12.3.2021</b><br>12:57:50 | 120        | 40      | -85      | GFZ      |
|                              | 294        | 49      | -94      |          |
|                              | 97         | 42      | -109     | GCMT     |
|                              | 302        | 51      | -73      |          |
|                              | 111        | 29      | -93°     | USGS     |
|                              | 295        | 61      | -88      |          |
|                              | 96         | 37      | -133     | INGV     |
|                              | 325        | 64      | -63      |          |

Table S3: Specifications of the Sentinel-1 SAR SLC images used in our InSAR analysis.

| Satellite    | Sensing date | Subswath number | Relative orbit | Pass direction |
|--------------|--------------|-----------------|----------------|----------------|
| Sentinel-1 A | 25/02/2021   | IW1             | 102            | Ascending      |
| Sentinel-1 B | 03/03/2021   | IW1             | 102            | Ascending      |
| Sentinel-1 A | 09/03/2021   | IW1             | 102            | Ascending      |
| Sentinel-1 B | 15/03/2021   | IW1             | 102            | Ascending      |
| Sentinel-1 A | 24/02/2021   | IW1             | 80             | Descending     |
| Sentinel-1 A | 8/03/2021    | IW1             | 80             | Descending     |
| Sentinel-1 B | 14/03/2021   | IW1             | 80             | Descending     |

Table S4: Master and slave scenes forming interferometric pairs used to detect and measure deformation of the three largest earthquake events that occurred in the Thessaly area during March 2021.

| Pair | Satellite             | Sensing date | Pass direction |
|------|-----------------------|--------------|----------------|
| 1st  | Sentinel-1 A (master) | 25/02/2021   | Ascending      |
|      | Sentinel-1 B (slave)  | 03/03/2021   | Ascending      |
| 2nd  | Sentinel-1 B (master) | 03/03/2021   | Ascending      |
|      | Sentinel-1 A (slave)  | 09/03/2021   | Ascending      |
| 3rd  | Sentinel-1 A (master) | 09/03/2021   | Ascending      |
|      | Sentinel-1 B (slave)  | 15/03/2021   | Ascending      |
| 4th  | Sentinel-1 A (master) | 24/02/2021   | Descending     |
|      | Sentinel-1 A (slave)  | 8/03/2021    | Descending     |
| 5th  | Sentinel-1 A (master) | 8/03/2021    | Descending     |
|      | Sentinel-1 B (slave)  | 14/03/2021   | Descending     |
